# Supplementary material for: Association between Lifestyle Changes and at-Home Hours during and after the State of Emergency Due to the COVID-19 Pandemic in Japan
Source: MDPI journal article supplement (doi:10.3390/nu13082698), 2021-08-04
Supplement: s1 [file s1]

**Table S1.** Changes in food intake during and after stay-at-home request period according to changes in at-home hours during the stay-at-home request period.

|                                                                                            | During Stay-at-Home Request Period                         |                                                        | <i>p</i> -Value <sup>2</sup> | After Stay-at-Home Request Period                          |                                                        | <i>p</i> -Value <sup>2</sup> |
|--------------------------------------------------------------------------------------------|------------------------------------------------------------|--------------------------------------------------------|------------------------------|------------------------------------------------------------|--------------------------------------------------------|------------------------------|
|                                                                                            | Non extended At-Home Hours <sup>1</sup> ( <i>n</i> = 6373) | Extended At-Home Hours <sup>1</sup> ( <i>n</i> = 3272) |                              | Non extended At-Home Hours <sup>1</sup> ( <i>n</i> = 6373) | Extended At-Home Hours <sup>1</sup> ( <i>n</i> = 3272) |                              |
|                                                                                            | %                                                          | %                                                      |                              | %                                                          | %                                                      |                              |
| Foods increased in consumption compared to those before the COVID-19 pandemic <sup>3</sup> |                                                            |                                                        |                              |                                                            |                                                        |                              |
| Cereals                                                                                    | 12.3                                                       | 25.2                                                   | <0.001                       | 9.1                                                        | 17.4                                                   | <0.001                       |
| Potatoes                                                                                   | 1.5                                                        | 4.0                                                    | <0.001                       | 1.7                                                        | 3.1                                                    | <0.001                       |
| Soy and soy products                                                                       | 5.0                                                        | 11.1                                                   | <0.001                       | 4.6                                                        | 9.9                                                    | <0.001                       |
| Vegetables                                                                                 | 5.5                                                        | 13.1                                                   | <0.001                       | 5.1                                                        | 11.8                                                   | <0.001                       |
| Fruits                                                                                     | 4.9                                                        | 11.9                                                   | <0.001                       | 5.2                                                        | 10.8                                                   | <0.001                       |
| Seaweed                                                                                    | 2.0                                                        | 4.7                                                    | <0.001                       | 1.9                                                        | 4.2                                                    | <0.001                       |
| Fish and seafoods                                                                          | 2.8                                                        | 6.3                                                    | <0.001                       | 2.6                                                        | 6.0                                                    | <0.001                       |
| Meat                                                                                       | 5.0                                                        | 9.8                                                    | <0.001                       | 3.8                                                        | 7.8                                                    | <0.001                       |
| Eggs and egg products                                                                      | 5.0                                                        | 10.5                                                   | <0.001                       | 3.7                                                        | 8.2                                                    | <0.001                       |
| Milk and dairy products                                                                    | 7.1                                                        | 16.7                                                   | <0.001                       | 6.0                                                        | 13.1                                                   | <0.001                       |
| Oily foods                                                                                 | 3.5                                                        | 7.9                                                    | <0.001                       | 2.8                                                        | 5.5                                                    | <0.001                       |
| Salty snacks and confectionary                                                             | 10.8                                                       | 26.8                                                   | <0.001                       | 7.8                                                        | 16.6                                                   | <0.001                       |
| Sugar-sweetened beverages                                                                  | 5.2                                                        | 11.7                                                   | <0.001                       | 4.1                                                        | 8.5                                                    | <0.001                       |
| Others                                                                                     | 0.5                                                        | 1.4                                                    | <0.001                       | 0.5                                                        | 1.1                                                    | <0.001                       |
| Foods decreased in consumption compared to those before COVID-19 pandemic <sup>3</sup>     |                                                            |                                                        |                              |                                                            |                                                        |                              |
| Cereals                                                                                    | 2.9                                                        | 5.6                                                    | <0.001                       | 3.7                                                        | 6.5                                                    | <0.001                       |
| Potatoes                                                                                   | 2.7                                                        | 4.5                                                    | <0.001                       | 2.5                                                        | 3.8                                                    | <0.001                       |
| Soy and soy products                                                                       | 1.3                                                        | 2.5                                                    | <0.001                       | 1.7                                                        | 2.6                                                    | 0.002                        |
| Vegetables                                                                                 | 2.9                                                        | 5.8                                                    | <0.001                       | 2.9                                                        | 5.2                                                    | <0.001                       |
| Fruits                                                                                     | 2.2                                                        | 5.0                                                    | <0.001                       | 1.9                                                        | 3.7                                                    | <0.001                       |
| Seaweeds                                                                                   | 1.6                                                        | 3.1                                                    | <0.001                       | 1.4                                                        | 3.0                                                    | <0.001                       |
| Fish and seafoods                                                                          | 2.8                                                        | 6.1                                                    | <0.001                       | 2.5                                                        | 5.0                                                    | <0.001                       |
| Meat                                                                                       | 2.5                                                        | 5.2                                                    | <0.001                       | 2.4                                                        | 4.5                                                    | <0.001                       |
| Eggs and egg products                                                                      | 0.9                                                        | 2.0                                                    | <0.001                       | 0.9                                                        | 2.0                                                    | <0.001                       |
| Milk and milk products                                                                     | 1.6                                                        | 2.3                                                    | 0.009                        | 1.4                                                        | 2.8                                                    | <0.001                       |
| Oily foods                                                                                 | 3.1                                                        | 7.6                                                    | <0.001                       | 2.8                                                        | 7.1                                                    | <0.001                       |
| Salty snacks and confectionary                                                             | 3.2                                                        | 5.7                                                    | <0.001                       | 3.5                                                        | 7.4                                                    | <0.001                       |
| Sugar-sweetened beverages                                                                  | 2.8                                                        | 6.1                                                    | <0.001                       | 2.6                                                        | 6.2                                                    | <0.001                       |
| Others                                                                                     | 0.1                                                        | 0.6                                                    | <0.001                       | 0.2                                                        | 0.3                                                    | 0.598                        |

<sup>1</sup> Changes in at-home hours during stay-at-home request period compared to those in the period before the COVID-19 pandemic. <sup>2</sup> Differences in distribution between groups were examined by chi-squared test. <sup>3</sup> Multiple answers were allowed.

**Table S2.** Lifestyle habits and body weight changes according to age group during and after stay-at-home request period among participants with extended at-home hours during stay-at-home request period ( $n = 3272$ ).

|                                           | During Stay-at-Home Request Period |      |      |      |      | $p$ -Value <sup>1</sup><br>(Cramer's V <sup>2</sup> ) | After Stay-at-Home Request Period |      |      |      |      | $p$ -Value <sup>1</sup><br>(Cramer's V <sup>2</sup> ) |
|-------------------------------------------|------------------------------------|------|------|------|------|-------------------------------------------------------|-----------------------------------|------|------|------|------|-------------------------------------------------------|
|                                           | 20 s                               | 30 s | 40 s | 50 s | ≥60  |                                                       | 20 s                              | 30 s | 40 s | 50 s | ≥60  |                                                       |
|                                           | %                                  | %    | %    | %    | %    |                                                       | %                                 | %    | %    | %    | %    |                                                       |
| Number                                    | 437                                | 499  | 534  | 458  | 1344 |                                                       | 437                               | 499  | 534  | 458  | 1344 |                                                       |
| Total PA                                  |                                    |      |      |      |      | <0.001                                                |                                   |      |      |      |      | <0.001                                                |
| Decreased                                 | 49.7                               | 48.9 | 45.7 | 45.9 | 51.7 | (0.093)                                               | 31.1                              | 27.1 | 28.7 | 27.3 | 34.5 | (0.117)                                               |
| No change                                 | 35.9                               | 39.1 | 42.5 | 46.1 | 43.0 |                                                       | 48.7                              | 61.5 | 59.4 | 64.6 | 59.2 |                                                       |
| Increased                                 | 14.4                               | 12.0 | 11.8 | 8.1  | 5.3  |                                                       | 20.1                              | 11.4 | 12.0 | 8.1  | 6.3  |                                                       |
| Heavy physical work or strenuous exercise |                                    |      |      |      |      | <0.001                                                |                                   |      |      |      |      | <0.001                                                |
| Decreased                                 | 18.8                               | 20.2 | 21.5 | 20.3 | 28.9 | (0.130)                                               | 16.2                              | 13.6 | 14.4 | 12.9 | 18.7 | (0.107)                                               |
| No change                                 | 65.7                               | 66.9 | 67.2 | 73.6 | 67.4 |                                                       | 68.0                              | 76.2 | 76.2 | 79.9 | 76.9 |                                                       |
| Increased                                 | 15.6                               | 12.8 | 11.2 | 6.1  | 3.7  |                                                       | 15.8                              | 10.2 | 9.4  | 7.2  | 4.5  |                                                       |
| Walking and standing                      |                                    |      |      |      |      | 0.193                                                 |                                   |      |      |      |      | <0.001                                                |
| Decreased                                 | 47.8                               | 44.1 | 40.4 | 41.5 | 43.9 | (0.041)                                               | 24.5                              | 21.6 | 22.1 | 22.1 | 28.3 | (0.080)                                               |
| No change                                 | 47.6                               | 51.3 | 54.1 | 55.5 | 52.4 |                                                       | 66.6                              | 73.7 | 71.9 | 75.1 | 68.1 |                                                       |
| Increased                                 | 4.6                                | 4.6  | 5.4  | 3.1  | 3.7  |                                                       | 8.9                               | 4.6  | 6.0  | 2.8  | 3.6  |                                                       |
| Sedentary activity                        |                                    |      |      |      |      | <0.001                                                |                                   |      |      |      |      | <0.001                                                |
| Decreased                                 | 6.6                                | 4.6  | 5.2  | 3.9  | 2.0  | (0.076)                                               | 8.5                               | 3.0  | 4.3  | 3.3  | 2.1  | (0.110)                                               |
| No change                                 | 56.3                               | 62.7 | 60.1 | 62.7 | 57.2 |                                                       | 68.2                              | 79.6 | 79.4 | 81.0 | 71.9 |                                                       |
| Increased                                 | 37.1                               | 32.7 | 34.6 | 33.4 | 40.8 |                                                       | 23.3                              | 17.4 | 16.3 | 15.7 | 26.0 |                                                       |
| Sleep duration                            |                                    |      |      |      |      | <0.001                                                |                                   |      |      |      |      | <0.001                                                |
| Became longer                             | 50.1                               | 37.9 | 39.0 | 27.3 | 19.0 | (0.178)                                               | 33.0                              | 21.2 | 19.7 | 14.2 | 13.5 | (0.131)                                               |
| No change                                 | 43.0                               | 56.1 | 57.7 | 67.0 | 75.1 |                                                       | 57.4                              | 69.9 | 74.7 | 80.6 | 80.3 |                                                       |
| Became shorter                            | 6.9                                | 6.0  | 3.4  | 5.7  | 5.9  |                                                       | 9.6                               | 8.8  | 5.6  | 5.2  | 6.2  |                                                       |
| Waketime                                  |                                    |      |      |      |      | <0.001                                                |                                   |      |      |      |      | <0.001                                                |
| Became later                              | 41.6                               | 31.3 | 33.0 | 21.6 | 15.0 | (0.165)                                               | 24.3                              | 14.4 | 17.4 | 10.0 | 9.7  | (0.120)                                               |
| No change                                 | 48.7                               | 61.1 | 58.1 | 71.8 | 75.5 |                                                       | 57.4                              | 72.1 | 69.7 | 77.1 | 78.6 |                                                       |
| Became earlier                            | 9.6                                | 7.6  | 9.0  | 6.6  | 9.5  |                                                       | 18.3                              | 13.4 | 12.9 | 12.9 | 11.8 |                                                       |
| Bedtime                                   |                                    |      |      |      |      | <0.001                                                |                                   |      |      |      |      | <0.001                                                |
| Became later                              | 32.3                               | 21.8 | 18.2 | 16.6 | 13.5 | (0.139)                                               | 22.2                              | 12.2 | 14.0 | 12.7 | 10.6 | (0.096)                                               |
| No change                                 | 50.3                               | 59.7 | 59.7 | 69.9 | 73.6 |                                                       | 60.0                              | 71.1 | 69.7 | 74.7 | 77.1 |                                                       |
| Became earlier                            | 17.4                               | 18.4 | 22.1 | 13.5 | 12.9 |                                                       | 17.8                              | 16.6 | 16.3 | 12.7 | 12.4 |                                                       |
| Amount of drinking <sup>3</sup>           |                                    |      |      |      |      | <0.001                                                |                                   |      |      |      |      | <0.001                                                |
| Increased                                 | 22.6                               | 29.7 | 25.2 | 21.1 | 16.1 | (0.164)                                               | 18.6                              | 15.8 | 17.3 | 15.2 | 15.5 | (0.116)                                               |
| No change                                 | 49.2                               | 54.1 | 59.9 | 70.3 | 74.6 |                                                       | 54.3                              | 62.6 | 68.4 | 72.7 | 73.3 |                                                       |
| Decreased                                 | 28.1                               | 16.2 | 15.0 | 8.6  | 9.3  |                                                       | 27.1                              | 21.6 | 14.3 | 12.1 | 11.2 |                                                       |

|                                |      |      |      |      |      |         |      |      |      |      |      |         |
|--------------------------------|------|------|------|------|------|---------|------|------|------|------|------|---------|
| Amount of smoking <sup>4</sup> |      |      |      |      |      | 0.006   |      |      |      |      |      | 0.129   |
| Increased                      | 35.2 | 35.2 | 34.4 | 20.4 | 22.9 | (0.135) | 31.0 | 26.4 | 24.2 | 18.4 | 17.2 | (0.104) |
| No change                      | 46.5 | 52.7 | 57.8 | 68.9 | 68.8 |         | 53.5 | 63.7 | 68.0 | 70.9 | 73.4 |         |
| Decreased                      | 18.3 | 12.1 | 7.8  | 10.7 | 8.3  |         | 15.5 | 9.9  | 7.8  | 10.7 | 9.4  |         |
| Frequency of defecation        |      |      |      |      |      | <0.001  |      |      |      |      |      | <0.001  |
| Increased                      | 13.7 | 9.4  | 6.9  | 3.9  | 4.4  | (0.097) | 11.0 | 6.8  | 5.4  | 4.8  | 4.2  | (0.078) |
| No change                      | 80.5 | 86.2 | 88.2 | 91.5 | 91.7 |         | 82.4 | 87.0 | 89.0 | 90.8 | 91.9 |         |
| Decreased                      | 5.7  | 4.4  | 4.9  | 4.6  | 3.9  |         | 6.6  | 6.2  | 5.6  | 4.4  | 3.9  |         |
| Frequency of main meals        |      |      |      |      |      | <0.001  |      |      |      |      |      | <0.001  |
| Increased                      | 17.4 | 16.4 | 12.7 | 9.2  | 6.1  | (0.155) | 11.0 | 7.4  | 4.1  | 3.9  | 3.6  | (0.129) |
| No change                      | 71.2 | 78.4 | 82.4 | 88.9 | 91.7 |         | 76.4 | 85.8 | 89.5 | 91.9 | 93.2 |         |
| Decreased                      | 11.4 | 5.2  | 4.9  | 2.0  | 2.2  |         | 12.6 | 6.8  | 6.4  | 4.1  | 3.1  |         |
| Frequency of snacking          |      |      |      |      |      | <0.001  |      |      |      |      |      | 0.001   |
| Increased                      | 38.2 | 36.1 | 33.7 | 28.8 | 26.6 | (0.080) | 23.6 | 18.6 | 16.7 | 16.6 | 16.4 | (0.062) |
| No change                      | 57.0 | 59.3 | 61.8 | 68.6 | 70.2 |         | 66.8 | 72.5 | 75.3 | 76.2 | 77.8 |         |
| Decreased                      | 4.8  | 4.6  | 4.5  | 2.6  | 3.1  |         | 9.6  | 8.8  | 8.1  | 7.2  | 5.9  |         |
| Body weight                    |      |      |      |      |      | <0.001  |      |      |      |      |      | <0.001  |
| Increased                      | 32.5 | 39.7 | 46.4 | 44.1 | 38.2 | (0.097) | 25.9 | 34.1 | 38.2 | 38.9 | 36.5 | (0.092) |
| No change                      | 45.5 | 42.7 | 40.4 | 44.3 | 50.7 |         | 43.0 | 42.3 | 40.3 | 43.2 | 46.6 |         |
| Decreased                      | 22.0 | 17.6 | 13.1 | 11.6 | 11.0 |         | 31.1 | 23.6 | 21.5 | 17.9 | 16.9 |         |

<sup>1</sup> Differences in distribution between groups were examined by chi-squared test. <sup>2</sup> Ranges from 0 to 1, where 1 indicates a strong association. <sup>3</sup> Excluding those who never drink. <sup>4</sup> Excluding those who never smoke.
